# Supplementary material for: Aggressive uveal melanoma displays a high degree of centrosome amplification, opening the door to therapeutic intervention
Source: PubMed Central journal article supplement (PMC9161346; doi:10.1002/cjp2.272), 2022-04-26
Supplement: CJP2-8-383-s001.pdf [file CJP2-8-383-s001.pdf]

**Aggressive uveal melanoma displays a high degree of centrosome amplification, opening the door to therapeutic intervention**

D Sabat-Pośpiech, K Fabian-Kolpanowicz *et al.* *J Pathol Clin Res* DOI: 10.1002/cjp2.272

**Supplementary Figures S1 and S2**

**Supplementary Table S1**

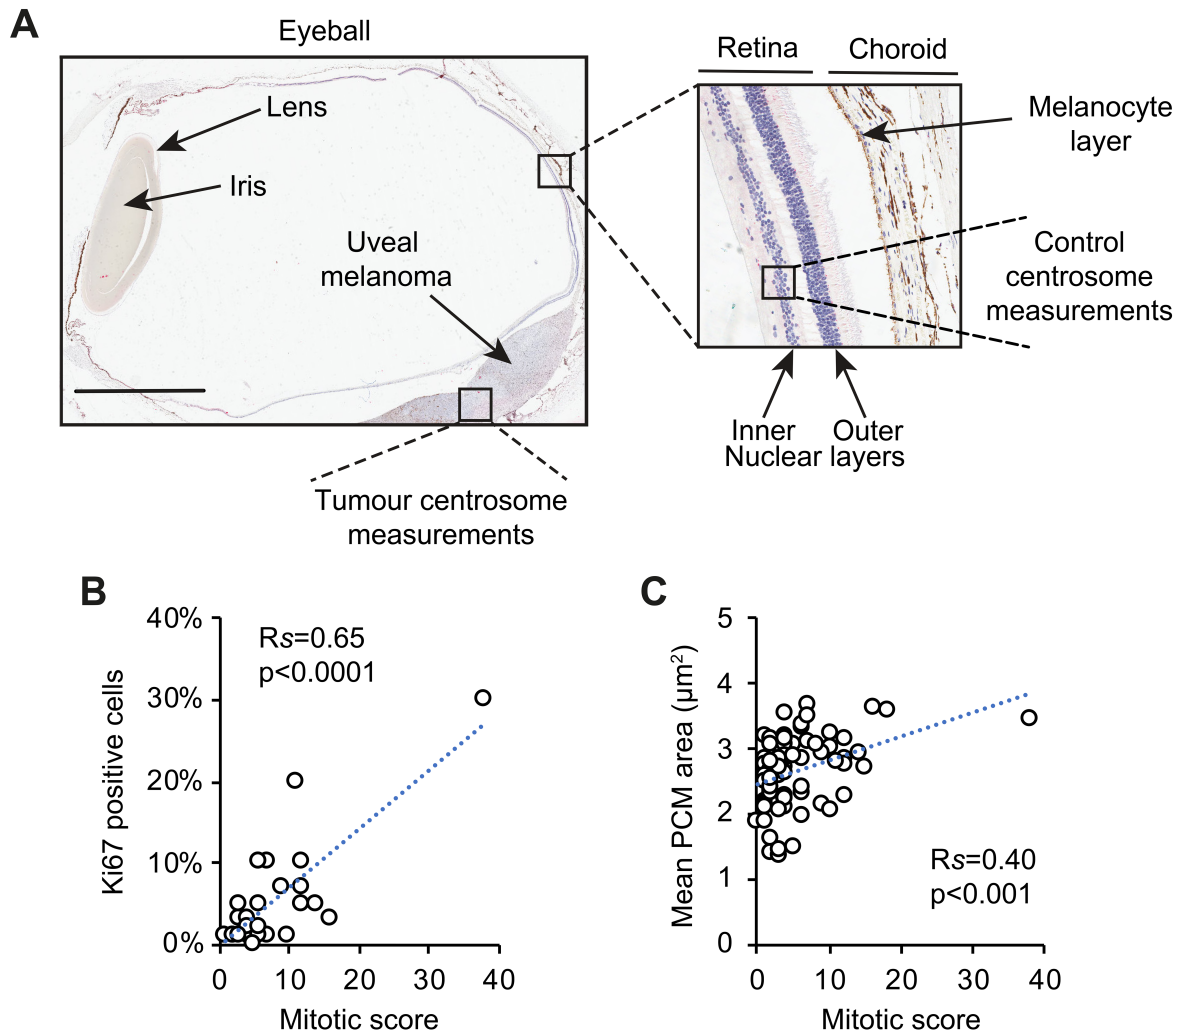

**Figure S1. Mitotic score is positively correlated with number of Ki67 positive cells and pericentriolar matrix size in UM samples.**

**(A)** An example image of the uvea with the regions used for centrosome amplification measurements indicated. Scale bar 5mm. **(B, C)** Mitotic score was calculated as number of mitoses per 40x field of view. Blue dashed trendline includes all values; statistical significance tested using one-tailed Spearman correlation coefficient. **(B)** Scatter plot comparing the mean number of Ki67 positive cells with mitotic score. **(C)** Scatter plot comparing the mean PCM size with mitotic score.

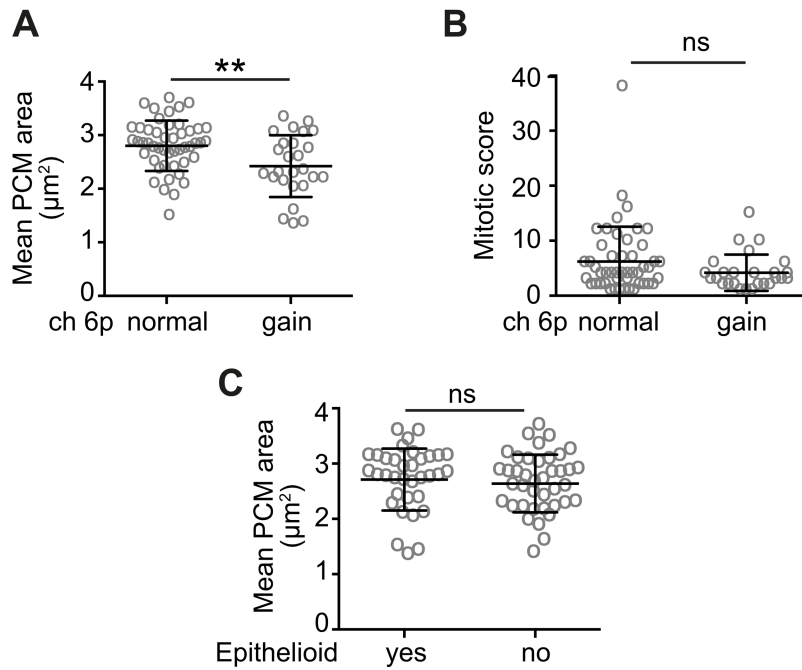

**Figure S2. Mean PCM area is associated with chromosome 6p status but not with cellular morphology in PUM samples.**

**(A & B)** Comparison of **(A)** mean PCM size and **(B)** mitotic score in UM tumours with different chromosome 6p status: normal (n=48) versus gain (n=26). Unpaired two-tailed T test, ns – not significant, \*\*p<0.01. **(C)** Comparison of mean PCM size in UM tumours categorised by different cell shape: epithelioid (n=35) versus non epithelioid (n=40). Unpaired two-tailed T test, ns – not significant.

| Cellular characteristics, protein expression and genetic alterations | Uveal Melanoma cell lines |                                 |           |                                 |                                 |                                 |
|----------------------------------------------------------------------|---------------------------|---------------------------------|-----------|---------------------------------|---------------------------------|---------------------------------|
|                                                                      | 92.1                      | MP46                            | Mel270    | Omm2.5                          | Omm2.3                          | MM66                            |
| Origin                                                               | Primary                   | Primary                         | Primary   | Liver Metastasis                | Liver Metastasis                | Liver Metastasis                |
| Cell Type                                                            | Epithelioid               | Mixed (Spindle and Epithelioid) | Spindle   | Mixed (Spindle and Epithelioid) | Mixed (Spindle and Epithelioid) | Mixed (Spindle and Epithelioid) |
| MelanA                                                               | +                         | +                               | +         | +                               | +                               | +                               |
| nuclear BAP1 (IHC)                                                   | +                         | -                               | +         | +                               | +                               | +                               |
| Chr 3                                                                | Partial losses            | Loss                            | Normal    | Normal                          | ND                              | Normal                          |
| Chr 8q                                                               | Gain                      | Gain                            | Normal    | Normal                          | ND                              | Gain                            |
| <i>GNAQ</i> mutation                                                 | c.626 A>T                 | c.626 A>T                       | c.626 A>C | c.626 A>C                       | c.626 A>C                       | -                               |
| <i>GNA11</i> mutation                                                | -                         | -                               | -         | -                               | -                               | c.626A >T                       |
| <i>BAP1</i> mutation                                                 | ND                        | -                               | ND        | ND                              | ND                              | -                               |
| <i>SF3B1</i> mutation                                                | -                         | -                               | -         | -                               | ND                              | -                               |
| <i>EIF1AX</i> mutation                                               | c.17 G/A                  | -                               | -         | -                               | ND                              | -                               |

**Table S1. UM cell line characteristics.**

ND, not determined; IHC, immunohistochemistry
